# Supplementary material
Source: HighWire-hosted journal article supplement (https://www.rsfjournal.org/highwire/filestream/4356/field_highwire_adjunct_files/4/Matching_counties.docx)

**Figure A1**

Map of Matching U.S. Counties

**
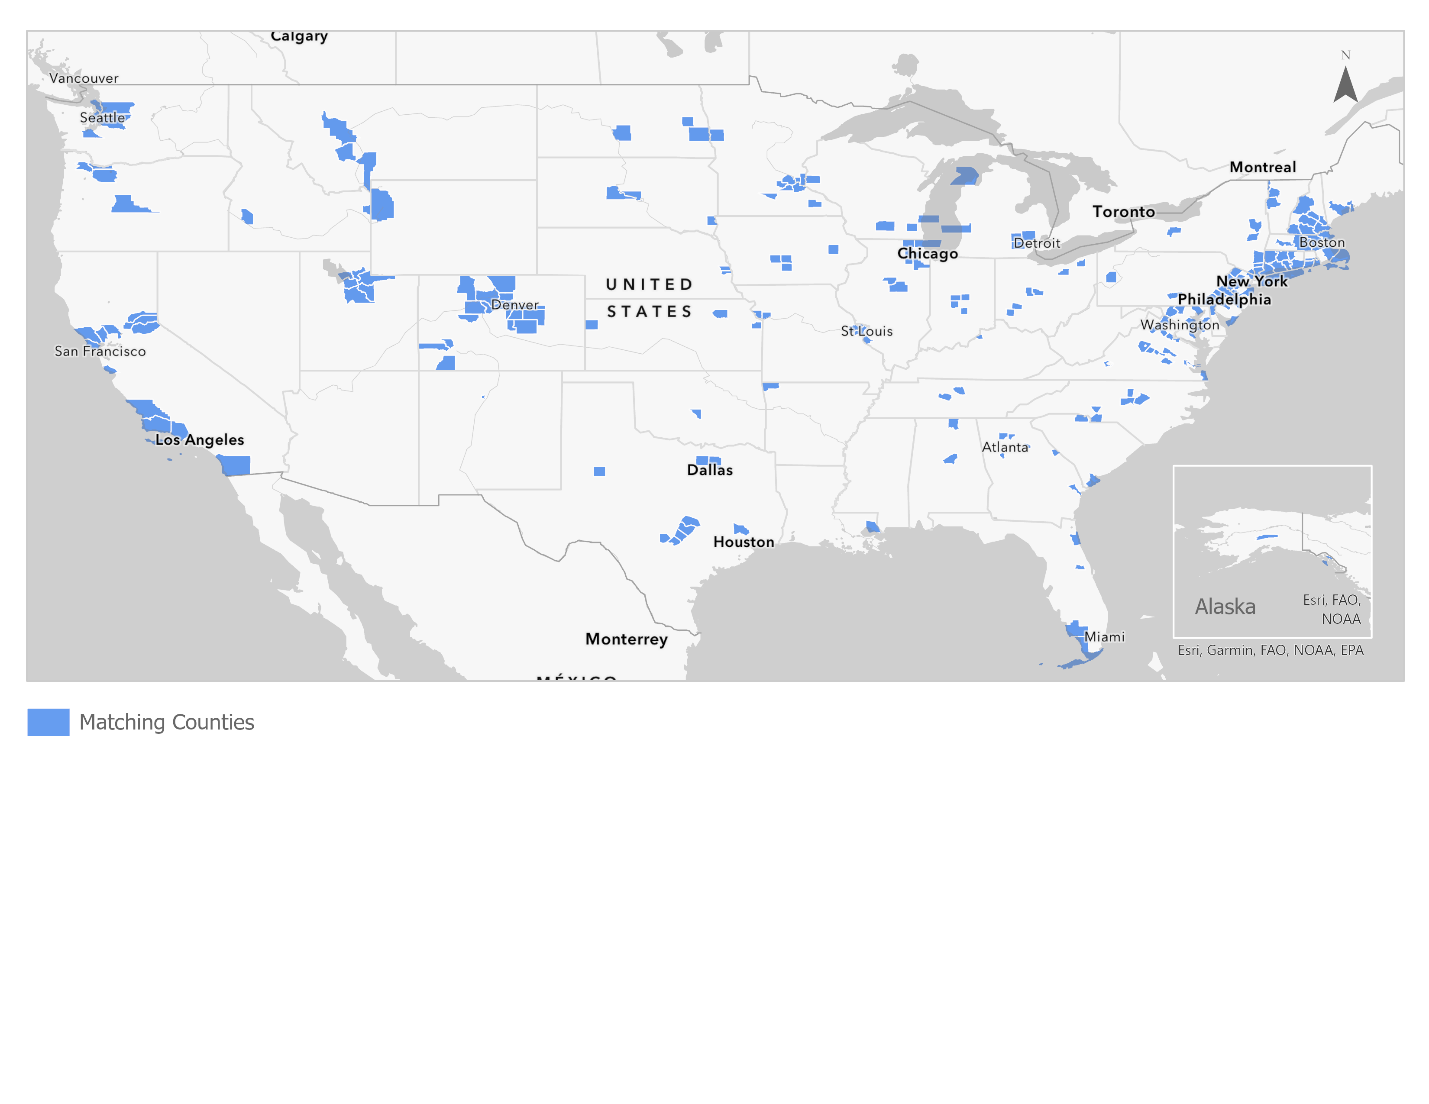
**

Supplement: Matching_counties.docx [file Matching_counties.docx]
